# Supplementary material
Source: publisher figshare collection journal article supplement (https://karger.figshare.com/articles/dataset/_/19368527)
Supplement: Supplementary file 1 [file 1]

**Table A:** Internal Consistencies and Descriptive Statistics of All Study Variables Across All Waves

|  | Time 1 (*n* = 243) | | |  | Time 2 (*n* = 184) | | |  | Time 4 (*n* = 164) | | |
| --- | --- | --- | --- | --- | --- | --- | --- | --- | --- | --- | --- |
|  | *α* | *M* | *SD* |  | *α* | *M* | *SD* |  | *α* | *M* | *SD* |
| DIPSI |  |  |  |  |  |  |  |  |  |  |  |
| Facets |  |  |  |  |  |  |  |  |  |  |  |
| Anxiousness | .90 | 1.89 | .71 |  |  |  |  |  |  |  |  |
| Depressive traits | .73 | 1.40 | .51 |  |  |  |  |  |  |  |  |
| Emotional Lability | .92 | 1.89 | .78 |  |  |  |  |  |  |  |  |
| Hyperexpressivity | .89 | 1.90 | .74 |  |  |  |  |  |  |  |  |
| Impulsivity | .89 | 1.91 | .83 |  |  |  |  |  |  |  |  |
| Ineffective stress coping | .90 | 2.07 | .77 |  |  |  |  |  |  |  |  |
| Insecure attachment | .77 | 1.99 | .74 |  |  |  |  |  |  |  |  |
| Irritability | .91 | 1.88 | .70 |  |  |  |  |  |  |  |  |
| Lack of self-confidence | .88 | 2.04 | .88 |  |  |  |  |  |  |  |  |
| Paranoid traits | .79 | 1.41 | .48 |  |  |  |  |  |  |  |  |
| Risk taking | .86 | 1.61 | .61 |  |  |  |  |  |  |  |  |
| OBVQ |  |  |  |  |  |  |  |  |  |  |  |
| Bully perpetration |  |  |  |  | .79 | 1.24 | .40 |  |  |  |  |
| Bully victimization |  |  |  |  | .80 | 1.72 | 1.27 |  |  |  |  |
| PID-5 |  |  |  |  |  |  |  |  |  |  |  |
| Anxiousness |  |  |  |  |  |  |  |  | .90 | 1.16 | .61 |
| Depressivity |  |  |  |  |  |  |  |  | .93 | .59 | .52 |
| Emotional lability |  |  |  |  |  |  |  |  | .89 | 1.19 | .66 |
| Hostility |  |  |  |  |  |  |  |  | .82 | 1.08 | .55 |
| Impulsivity |  |  |  |  |  |  |  |  | .83 | 1.11 | .54 |
| Risk taking |  |  |  |  |  |  |  |  | .90 | 1.37 | .51 |
| Separation insecurity |  |  |  |  |  |  |  |  | .71 | 1.22 | .51 |

*Note:* All variables ranged from 1 to 5.
